# Supplementary material for: An evaluation of the alignment of drought policy and planning guidelines with the contemporary disaster risk reduction agenda
Source: Copernicus journal article supplement (doi:10.5194/nhess-25-2155-2025), 2025-07-03
Supplement: Supplementary file 1 [file nhess-25-2155-2025-supplement.zip]

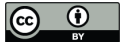

## *Supplement of*

# **An evaluation of the alignment of drought policy and planning guidelines with the contemporary disaster risk reduction agenda**

**Ilyas Masih**

*Correspondence to:* Ilyas Masih (i.masih@un-ihe.org)

- nhess-25-2155-2025-supplement-title-page.pdf
- Supplementary Material\_Masih\_Drought guidelines paper
  - Supplementary material 2\_ Scores and remarks\_SENDAI Framework Priorities.xlsx
  - Suplementray Material 1\_EM-DAT Data and Analysis.xlsx

The copyright of individual parts of the supplement might differ from the article licence.
