# Supplementary material for: An evaluation of the alignment of drought policy and planning guidelines with the contemporary disaster risk reduction agenda
Source: Copernicus journal article supplement (doi:10.5194/nhess-25-2155-2025), 2025-07-03
Supplement: Supplementary file 2 [file Suplementary material 2_ Scores and remarks_SENDAI Framework Priorities.xlsx]

## Sheet: Paper Info
Supplementary Material 1
Paper Title: An evaluation of the alignment of drought policy and planning guidelines with the contemporary disaster risk reduction agenda
Author: Ilyas Masih
Author's Affiliation: IHE Delft Institute for Water Education, Westvest 7, P.O. Box 3015, 2601 DA, Delft, the Netherlands
Correspondence to: Ilyas Masih (i.masih@un-ihe.org)

## Sheet: Scoring matrix
Description and colour scheme of the scoring grid used in evaluation for this study.
Classification	Score range	Scoring guide
Very Low (VL)	0-10	The element is not covered or just briefly mentioned.
Low (L)	2024-11-30	The element is mentioned in some details, but sufficient information is lacking on concept, methods, data and tools. The references to supporting materials and examples are very limited.
Medium Low (ML)	31-50	The element is a core component of the approach. Although some information is provided on concept, methods, data and tools, important details are missing. Few references on supporting materials are included.
Medium High (MH)	51-70	The element is a core component of the approach, and receives a good coverage on concept, methods, data and tools. Most of the important details are reasonably well covered. Few references on supporting materials are included. The information is well supported by at least one or few case study examples.
High (H)	71-90	The element is a core component of the approach, and receives a very good coverage on concept, methods, data and tools. Most of the important details are well covered. Most important references on supporting materials are included and discussed in detail. The element is sufficiently underpinned by state-of-the-art on the topic and builds on the case study examples.
Very High (VH)	91-100	The element is a core component of the approach, and receives an excellent coverage on concept, methods, data and tools. The important details are covered in a comprehensive and very good manner. The element is strongly underpinned by state-of-the-art on the topic and builds on the case study examples and global best practices.

## Sheet: Scores and remarks
The four priority areas of the SENDAI Framework and corresponding thematic elements used in the evaluation (UNISDR, 2015)		The Ten-Step Drought Planning Process (Wilhite, 1991; Wilhite et al., 2000; WMO and GWP, 2014)	Dealing with Drought: A Handbook for Water Suppliers in British Columbia (British Columbia, 2004 & 2022).	Drought risk reduction framework (UNISDR, 2007 and 2009)	MEDROPLAN Guidelines (Iglesias et al., 2007)	Guidelines to Develop a Drought Management Plan for the European Union Member States, EU Guidelines (European Commission, 2007)	The Near East Drought Planning Manual: Guidelines for Drought Mitigation and Preparedness Planning (FAO and NDMC, 2008)	Guidelines for preparation of the Drought Management Plans for Central and Eastern European Countries (GWPCEE, 2015).	The Drought Resilient and Prepared Africa (DRAPA) Strategic Framework (UNCCD, 2018)	Drought hazard and risk assessment guide (World Bank, 2019)	Drought Resilience, Adaptation and Management Policy Framework Supporting Technical Guidelines (UNCCD, 2019)	A nine‑step approach for developing and implementing an agricultural drought risk management plan (ADRMP) (Marj and Abadi, 2020)	A nine-step approach for participatory drought preparedness plan (DPP) for hydrosystems and cities (Filho et al., 2023)
Priority area and main elements considered in the evaluation	Key points per main element considered in the evaluation	Scores and remarks	Scores and remarks	Scores and remarks	Scores and remarks	Scores and remarks	Scores and remarks	Scores and remarks	Scores and remarks	Scores and remarks	Scores and remarks	Scores and remarks	Scores and remarks
Priority 1 Understanding disaster risk. Disaster risk management needs to be based on an understanding of disaster risk in all its dimensions of vulnerability, capacity, exposure of persons and assets, hazard characteristics and the environment.
Data and information	Collection, analysis, management and use of relevant data and practical information.	80: Step 4 dedicated to data and information. Very good coverage with useful insights and best practices. However, specific case study examples could be improved.	85: Core component; very good details; examples of different data sources provided with links.	98: Core component, excellent coverage of the topic, with so many examples and links to several databases.	85: Core component; very good details; examples of different data types needed are discussed; few examples provided.	90: Core component, very good coverage of the topic, several examples from Europe, and some links are provided for databases/information.	75: good coverage, with listing of important data and information; supported by some examples and links to sources.	85: Step 5 dedicated to data and information. Very good coverage with useful insights and best practices., with few examples for the focused countries.	92: Core component, very good coverage of the topic, with so many examples and links to several databases.	98: Core component, excellent coverage of the topic, with so many examples and links to several databases.	100: Core component, excellent coverage of the topic, with so many examples and links to several databases.	60: Core component; a dedicated section in methodology with reasonably good coverage with few examples, though important details and links/references are missing.	60: Core component; a dedicated step in the methodology (step 5) with reasonably good coverage with few examples, though important details and links/references are missing.
Risk assessment	Assess disaster risks, vulnerability, capacity, exposure and hazard characteristics.	85: Core element; very well covered, especially under step 4 & 5 (vulnerability, capacity, exposure, hazard, impacts) with details and few examples.	60: Risk assessment an important component. Some elements of risk assessment covered, with more focused on water supply and demand, ecology and impact parts. Drought hazard monitoring is briefly mentioned. The sufficient details are lacking, especially on vulnerability and capacity parts.	95: Excellent coverage of key components with details on methods and supported by examples. One component of the framework mainly dedicated to risk assessment part.	95: Excellent coverage of key components with details on methods for agriculture and water supply sectors; and supported by examples from the Mediterranean region. Methodological component of the guideline is fully dedicated to risk assessment part.	80: Core component, very good coverage of hazard, and impacts; vulnerability is well covered for water and environmental systems, though details on social vulnerability or specific communities at risk are lacking; more focused on economic sectors; the risk assessment well supplemented by examples from few European countries.	80: core component, very good coverage of hazard, vulnerability and impact assessment; with discussion of methods, tools and supplemented by few examples. Capacity part could have been enhanced.	80: Core component; risk and impact assessment part very well established and supplemented with examples; good coverage on hazard and vulnerability part as well. Details on capacity part were lacking.	70: Core component; good coverage of most of the elements in a summarized way; links to important references mentioned. More information on methods and tools on the topics could strengthen the topics.	95: Core component; Very good to excellent coverage with links to sources and examples. For example, excellent coverage on hazard, vulnerability and impact aspects.	95: Core component; Very good to excellent coverage with links to sources and examples. For example, excellent coverage on hazard and vulnerability part was extremely well coverage. The adaptive capacity is also very well covered. The impact part is good.	60: Core component. Good coverage of hazard, vulnerability and impact parts with focus on agriculture sector. Capacity part not sufficiently addressed. Limited information on details provided.	60: Core component. Diagnostic step provide satisfactory to good of hazard, vulnerability and impact parts with focus on hydrosystems. Capacity part is not sufficiently addressed. Limited information on details are provided.
Local knowledge and practices	Complement scientific knowledge with traditional, indigenous and local knowledge, as appropriate.	10: No/very limited coverage; local needs and tailored actions could be somewhat included through participation of local communities/stakeholders.	20: Very limited coverage; participation of first nation (indigenous communities) is recommended as part of local teams. The tailoring of drought management actions to local needs is mentioned.	75: Good to very good coverage of indigenous and traditional knowledge and practices. Several case study examples are mentioned; the references on more information on the topic are provided.	10: No/very limited coverage; local needs and tailored actions could be considered somewhat included through participation of local communities/stakeholders.	10: No/very limited coverage; local needs and tailored actions could be considered somewhat included through participation of local communities/stakeholders.	10: No/very limited coverage; local needs and tailored actions could be considered somewhat included through participation of local communities/stakeholders.	10: No/very limited coverage; local needs and tailored actions could be considered somewhat included through participation of local communities/stakeholders.	20: Local, traditional and indigenous knowledge is briefly mentioned. However, sufficient details are lacking.	10: No/very limited coverage; local needs and tailored actions could be considered somewhat included through participation of local communities/stakeholders.	10: No/very limited coverage; local needs and tailored actions could be considered somewhat included through participation of local communities/stakeholders.	10: No/very limited coverage; local needs and tailored actions could be considered somewhat included through participation of local communities/stakeholders.	10: No/very limited coverage; local needs and tailored actions could be considered somewhat included through participation of local communities/stakeholders.
Capacity Development	Strengthen technical and scientific capacity.	70: Step 9 dedicated to education. Reasonably good coverage on education and capacity development with useful insights and best practices. However, specific case study examples could be improved.	20: Very limited coverage. Education is briefly mentioned as part of water conservation planning.	95: Very good to excellent coverage. Capacity development and awareness building, education and training are covered in details. For example, capacity development concepts, methods, examples and resources are very well covered.	60: Good coverage of capacity development aspects. Education and awareness raising is also briefly mentioned. However, specific case study examples could be improved.	65: Medium to good coverage of capacity development aspects, though more focus on infrastructure capacity than technical and scientific capacity development. Awareness raising is also briefly mentioned. Education is very briefly mentioned. Moreover, specific case study examples could be improved.	10: Not covered. Capacity development is briefly mentioned in few instances.	50: Education is a core component covered in step 9. This also includes awareness raising. Capacity development is not explicitly mentioned but is part of educational activities. However, specific case study examples could be improved.	75: Good to very good coverage. Capacity development and awareness building, education and training are well covered. Awareness raising is a core element of the framework alongside good coverage on capacity building. However, more details on relevant concepts, examples and resources could further strengthen the guidelines.	30: Low coverage. The element is mentioned in some details but sufficient information is lacking. Capacity mainly refers to the infrastructure and environment. Awareness raising and education is briefly covered.	70: Good to very good coverage of capacity development aspects. Awareness raising and education are also briefly mentioned. The capacity development receive good coverage, for example adaptive capacity is covered in detail under vulnerability assessment. However, specific case study examples could be improved.	20: Low coverage. The element is briefly mentioned but sufficient information is lacking. Education is briefly covered under plan development and publishing part.	10: Very low coverage. The element is not covered. Capacity is mentioned at few times, mainly related to infrastructure and environment.
	Promote the incorporation of disaster risk knowledge in formal and non-formal education.	80: Step 9 dedicated to education. Very good coverage on recommending range of education programmes for formal and non-formal education.	20: Very limited coverage. Education is briefly mentioned as part of water conservation planning.	95: Very good to excellent coverage on education with many ideas and recommendations alongside some examples.	20: Educational activities are briefly mentioned as part of drought mitigation measures.	10: Very limited coverage; education is listed couple of times.	5: Education not covered. Capacity development is briefly mentioned in few instances.	35: Educational programmes are covered under step 7, though important details are missing.	60: Reasonably good coverage on education. However, more details on relevant concepts, examples and resources could further strengthen the guidelines.	10: Very limited coverage; education is listed couple of times.	10: Very limited coverage; education is listed few times.	25: Low coverage. The element is briefly mentioned but sufficient information is lacking. Education is briefly covered under plan development and publishing part.	5: Very low coverage. The element is not covered. Capacity is mentioned at few times, mainly related to infrastructure and environment.
	Strengthen public education and awareness.	80: Step 8 considers public awareness as an important element. Very good coverage on awareness raising for various target groups.	5: Not included. Only indirectly as part of education, which is also briefly mentioned.	95: Very good to excellent coverage on public education and awareness with many ideas and recommendations alongside some examples.	20: Awareness and educational activities are briefly mentioned. However, details are lacking.	20: Low coverage. Awareness raising activities are briefly mentioned. However, details are lacking.	5: Public education and awareness is not covered. Capacity development is briefly mentioned in few instances.	15: Public education and awareness are briefly covered under step 7, though important details are missing. Information on awareness raising is very limited.	75: Good to very good coverage on awareness raising alongside good coverage on education.	10: Very limited coverage on public education and awareness. Education and awareness is listed only a few times.	10: Very limited coverage on public education and awareness.	10: Very limited coverage on public education and awareness.	5: Very low coverage. The element is not covered. Capacity is mentioned at few times, mainly related to infrastructure and environment.
Science-policy-practice dialogue	Promote and improve dialogue and cooperation among scientific and technological communities, other relevant stakeholders and policymakers in order to facilitate a science-policy interface for effective decision-making in disaster risk management.	80: Step 7 considers integration of science and policy aspects of drought planning and management. Communication between science and policy communities is emphasized besides providing some useful suggestions to improve knowledge gap across both communities.	10: Very low coverage. Science-Policy-Practice dialogue is not included. Only indirectly as part of stakeholder participation process.	75: Reasonably good coverage of science-policy-practice dialogue, with focus on stressing the need and usefulness of dialogue among key actors such as disaster researchers, practitioners and stakeholders. More information by providing examples could have been strengthened the aspect.	85: Very good coverage on multi-stakeholder dialogue within the main document. Additional details are provided through a dedicated chapter on the topic.	10: Very low coverage. Science-Policy-Practice dialogue is not included. Only indirectly as part of public information and stakeholder participation process.	10: Very low coverage. Science-Policy-Practice dialogue is not included. Only indirectly as part of Step 3 Fostering Involvement and Developing Common Understandings.	10: Very low coverage. Science-Policy-Practice dialogue is not included. Only indirectly as part steps related to policy and plan formulation process (e.g., interdisciplinary drought committee and its role in the process)	30: Science-policy-practice aspects are mentioned at several occasions including the need for a dialogue among disaster researchers, practitioners and stakeholders. However, systematic focus on the topic is lacking.	10: Very low coverage. Science-Policy-Practice dialogue is not included. Only indirectly as part scoping phase where different sectors are included.	10: Very low coverage. Science-Policy-Practice dialogue is not included. Only indirectly as part vulnerability assessment pillar.	10: Very low coverage. Science-Policy-Practice dialogue is not included. Only indirectly as part of stakeholder participation process.	10: Very low coverage. Science-Policy-Practice dialogue is not included. Only indirectly as part of stakeholder participation process during the workshops.
Research and development	Promote investments in innovation and technology development in long-term, multi-hazard and solution-driven research in disaster risk management to address gaps, obstacles, interdependencies and social, economic, educational and environmental challenges and disaster risks.	70: Step 6 considers research needs and give some examples of possible research directions such as linking indicators, thresholds and impacts; exploring the impacts of climate change.	5: Not included. Only indirectly as part of assessments such as hazard and vulnerability assessment	65: Research is well integrated in the guiding document under various topics such as drought assessment and vulnerability analysis. Several research studies are presented as examples. Description of and reference to various organizations are made who conduct drought related research. However, a more dedicated section on research outlining the specific points of evaluation was lacking.	30: Low coverage. Although the guidance are based on research studies, the research is only briefly covered and not systematically included in various components of the guidelines. Nevertheless, it can be indirectly seen as part of various components such as methodological component.	75: research is an integral component of the guide, and receive a good coverage. A number of research areas are identified, and role of EU level institutions such as European Drought Observatory is highlighted.	30: Low coverage. The research is only briefly covered and not systematically included in various components of the guidelines. Nevertheless, it can be indirectly seen as part of various components.	70: Step 5 considers research programmes. Specific research topics for the countries in the region are mentioned.	30: The research is only briefly covered and not systematically included in various components of the guidelines. Nevertheless, it can be indirectly seen as part of various components.	30: Low coverage. The research is only briefly covered and not systematically included in various components of the guidelines. However, various steps in each phase involves answering several questions, which indirectly involves research.	30: Low coverage. The research is only briefly covered and not systematically included in various components of the guidelines. Nevertheless, it can be indirectly seen as part of various components.	40: Low to medium coverage. The research is included in the methodology and is briefly covered under Phase IV: establishment and activating the “recognition and assessment team”. However, details are lacking.	5: Not included. Only indirectly as part of data analysis and modelling.
Communication and dissemination	Promote real time access to reliable data and information.	75: The provision of drought related data and information is stressed under step 8 (Publicize the national drought management policy and preparedness plans and build public awareness and consensus)	80: The provision of drought related data and information is highlighted alongside providing links to sources where possible.	95: Very good to excellent coverage, with details on needs, recommendations, examples and sources.	50: Low to medium level of coverage on data and information.	80: Good to very good coverage on data and information, with details on monitoring and sharing.	10: Very low coverage.	75: Good coverage; the provision of drought related data and information is stressed.	50: Low to medium coverage; data and information sharing is highlighted, e.g., as part of monitoring and early warning system including communication aspects.	80: Good to very good coverage. Data and information aspects including monitoring and links to various databases/sources.	80: Good to very good coverage. Data and information aspects including monitoring and links to various databases/sources.	70: Medium to good coverage; well covered in methods section and also under phase III (establishing a coherent communications‑network between stakeholders and teams of the plan to collaborate and exchange information)	50: Low to medium coverage; mainly from the angle of data collection and use in modelling.
	Make non-sensitive hazard-exposure, vulnerability, risk, disaster and loss-disaggregated information freely available and accessible, as appropriate.	80: The provision of drought related data and information is stressed under step 8 (Publicize the national drought management policy and preparedness plans and build public awareness and consensus). Making plans public and prepare and follow communication and dissemination strategies throughout the process are discussed in detail.	60:Medium coverage. Communication is considered an important component of the guideline; communication across various responsible agencies and other stakeholders is mentioned.	95: Very good to excellent coverage, with details on needs, recommendations, examples and sources.	60: medium coverage; dissemination is an important element in the public review component of the methodology, and is briefly mentioned.	75: Good very good coverage on communication and dissemination for stakeholders, across countries/EU level.	20: Low coverage. Communication mentioned at few times as part of tasks force/committees.	80: Good to very good coverage; communication and dissemination is well coverage, for instance as part of different committees and publication of the plan and sharing of the relevant information.	60: Medium coverage; communication and dissemination is an integral part, though details are lacking.	40: Low to medium coverage, mainly as part of assessments in different phases such as early warning systems. However, there is a lack of emphasis on communication and dissemination aspects	70: Good coverage. Communication is an important component alongside capacity development and education.	70: Medium to good coverage; well covered in methods section and also under phase III (establishing a coherent communications‑network between stakeholders and teams of the plan to collaborate and exchange information)	50: Low to medium coverage. Communication and dissemination is mainly part of interaction with stakeholders during workshops.
	Enhance collaboration among people at the local level to disseminate disaster risk information through the involvement of community-based organizations and nongovernmental organizations.	80: The provision of drought related data and information is stressed under step 8 (Publicize the national drought management policy and preparedness plans and build public awareness and consensus). Making plans public and prepare and follow communication and dissemination strategies throughout the process are discussed in detail. Communication across different stakeholders representing drought p…	60: Medium coverage. Communication is considered an important component of the guideline; communication across various responsible agencies and other stakeholders is mentioned.	95: Very good to excellent coverage, with details on needs, recommendations, examples and sources.	60: medium coverage; dissemination is an important element in the public review component of the methodology, and is briefly mentioned.	75: Good very good coverage on communication and dissemination for stakeholders, across countries/EU level.	20: Low coverage. Communication mentioned at few times as part of tasks force/committees.	80: Good to very good coverage; communication and dissemination is well coverage, for instance as part of different committees and publication of the plan and sharing of the relevant information.	60: Medium coverage; communication and dissemination is an integral part, though details are lacking.	40: Low to medium coverage, mainly as part of assessments in different phases such as early warning systems. However, there is a lack of emphasis on communication and dissemination aspects	70: Good coverage. Communication is an important component alongside capacity development and education.	70: Medium to good coverage; well covered in methods section and also under phase III (establishing a coherent communications‑network between stakeholders and teams of the plan to collaborate and exchange information)	50: low to medium coverage. Communication and dissemination is mainly part of interaction with stakeholders during workshops.
Priority 2 Strengthening disaster risk governance to manage disaster risk. Disaster risk governance at the national, regional and global levels is vital to the management of disaster risk reduction in all sectors and ensuring the coherence of national and local frameworks of laws, regulations and public policies that, by defining roles and responsibilities, guide, encourage and incentivize the pu…
Policy and governance	Mainstream and integrate disaster risk reduction within and across all sectors.	75: Good to very good coverage; the representation of multiple sectors is emphasized alongside collaborative policy and governance mechanisms (see steps 3 and 5).	50: Low to medium coverage; the focus of the guide is on water supply sector. Overall policy and governance is not the main focus. However, some relevant by-laws are included, and evaluation of plans in relation to laws and local plans is recommended.	95: Excellent coverage. Policy and governance is a core element which is covered in an excellent manner.	85: Very good to excellent coverage. Multi-sectoral approach is followed, with details given for agriculture and water supply sectors. Various committees address policy and governance aspects. The organizational component is specifically dedicated to policy and governance aspects.	70: Good coverage. Multi-sectoral approach is followed and a reasonably good attention is paid for drought planning for various sectors of economy.	70: Good coverage. Multi-sectoral approach is followed and a reasonably good attention is paid for drought planning for various sectors of economy.	85: Very good coverage. Focus on multiple sectors is very well covered.	95: Excellent coverage. Policy and governance is a core element which is covered in an excellent manner. Multiple and vulnerable sectors to drought risk are covered in a very good to excellent manner.	95: Excellent coverage. Multiple sectors are considered for example in vulnerability and impact assessment.	70: Good coverage. Multi-sectoral approach is recommended with focus on most vulnerable sectors. Reasonably good information is provided in various sections, in particular vulnerability assessment.	35: Low to medium coverage. The main focus is on agriculture sector.	50: Low to medium coverage. The main focus is on hydrosystems and city scale planning. Various stakeholders representing multidisciplinary group and different authorities and sectors are involved.
	Review and promote the coherence and further development, as appropriate, of national and local frameworks of laws, regulations and public policies.	85: Very good, as policy formulation is the core focus of the guide and several steps (e.g., step 1, 2 and 5) are dedicated for this. The topic is covered in a very good manner including details with examples. However, the issue of policy coherence does not receive sufficient explicit attention.	50: Low to medium coverage; the focus of the guide is on water supply sector. Overall policy and governance is not the main focus. However, some relevant by-laws are included, and evaluation of plans in relation to laws and local plans is recommended.	95: Excellent coverage. Policy and governance is a core element which is covered in an excellent manner.	80: Good to very good coverage; organizational component provide detailed guidelines on relevant questions alongside of application examples. However, the focus is more an analysis of existing governance instrument and less on coherence.	85: Very good coverage. For example relevant policies such as EU Common Agriculture Policy and Water Framework Directive are well covered.	70: Reasonably good coverage. Drought policies and plan development is a core focus.	85: Very good, as policy formulation is the core focus of the guide and several steps (e.g., step 1, 2 and 5) are dedicated for this. The topic is covered in a very good manner including details with examples. A good coverage is provided on EU policies/directives and alignment across scales.	95: Excellent coverage. Policy and governance is a core element which is covered in an excellent manner. For example, global, regional and national policies are discussed.	25: Low coverage. Policy, laws and regulations lack details.	25: Low coverage. Policy, laws and regulations lack details.	35: low to medium coverage. Policies, laws and regulations lack details.	25: Low coverage. Laws, regulations and policies are not the main focus and lack details.
Strategies and plans	Adopt and implement national and local disaster risk reduction strategies and plans.	85: very good. Core component of the methodology, with step 5 fully dedicated to formulation of a plan/strategy.	75: Good to very good coverage for water supply and water conservation plans and strategies.	95: Excellent coverage. Strategies and plans are core elements, which are covered in an excellent manner.	85: Very good to excellent coverage as formulating plans (including measures and strategies) is the main focus of the guide.	85: Very good to excellent coverage as formulating plans (including measures and strategies) is the main focus of the guide.	70: Reasonably good coverage. Drought policies and plan development is a core focus.	85: very good. Core component of the methodology, with step 4 fully dedicated to formulation of a plan/strategy.	85: Very good to excellent coverage. Strategies and plans are core elements, which are covered in a very good to excellent manner.	80: Good to very good coverage . Strategies and plan formulation are well covered as part of step 4 implementation.	75: Good to very good coverage . Strategies and plan formulation are well covered as part of drought risk reduction measures.	80: Good to very good coverage. Mitigation and contingency planning is well covered (see step 6).	80: Good to very good coverage. Formulating drought plan is the core focus of the methodology, which is underpinned by participatory workshops and application of data analysis and modelling tools.
Community representation	Assign, as appropriate, clear roles and tasks to community representatives within disaster risk management institutions and processes and decision-making.	70: Good coverage; community representation is part of general stakeholder involvement process and public awareness and consultation (see steps 3 and 8 for example).	80: Good to very good coverage for including various stakeholders including communities in the planning process.	95: Excellent coverage on community representation.	70: Good coverage; community representation is part of general stakeholder involvement process and public awareness and consultation.	70: Good coverage; community representation is part of general stakeholder involvement process covered under public information and active public participation.	65: Medium to good coverage; community representation is part of general stakeholder involvement process	70: Good coverage; community representation is part of general stakeholder involvement process and public awareness and consultation.	90: Excellent coverage on community representation. Community level drought policy and planning is very well covered alongside community participation.	80: Good to very good coverage; community representation is part of general stakeholder involvement process as well as drought assessment at local/community scale.	75: Good to very good coverage; community representation is part of various components such as vulnerability and impact assessment.	75: Good coverage; community representation is part of various components such as executive team and stakeholder participation.	60: Medium coverage; community representation is part of stakeholder participation in workshops.
	Undertake comprehensive public and community consultations.	70: Good coverage; community representation is part of general stakeholder involvement process and public awareness and consultation (see steps 3 and 8 for example).	80: Good to very good coverage for including various stakeholders including communities in the planning process.	95: Excellent coverage on community representation.	70: Good coverage; community representation is part of general stakeholder involvement process and public awareness and consultation.	70: Good coverage; community representation is part of general stakeholder involvement process covered under public information and active public participation.	65: Medium to good coverage; community representation is part of general stakeholder involvement process.	70: Good coverage; community representation is part of general stakeholder involvement process and public awareness and consultation.	90: Excellent coverage on community representation. Community level drought policy and planning is very well covered alongside stakeholder and community participation.	80: Good to very good coverage; community representation is part of general stakeholder involvement process as well as drought assessment at local/community scale.	75: Good to very good coverage; community representation is part of various components such as vulnerability and impact assessment.	75: Good coverage; community representation is part of various components such as executive team, stakeholder participation and communication.	40: Low to medium coverage; public and community representation is part of stakeholder participation in workshops.
Coordination mechanisms	Establish and strengthen government coordination forums composed of relevant stakeholders at the national and local levels.	85: Very good coverage. Commissions and committees are recommended to take on the coordination role.	80: Good to very good coverage for including various stakeholders including communities in the planning process. The specific committees/teams are tasked for coordination.	90: Excellent coverage.	85: Very good coverage. Commissions and committees are recommended to take on the coordination role.	85: Very good coverage. For example, coordination across various administration levels including competent authorities is well elaborated. Transboundary coordination is outlined as well.	85: Very good coverage. Drought coordination team, task force and committees are recommended to take on the coordination role.	85: Very good coverage. Commissions and committees are recommended to take on the coordination role.	80: Very good coverage. Participatory approach at various level is indicated alongside of coordination needs and suggestions.	65: Medium coverage. The details on coordination aspects are lacking, although stakeholder and community participation including sectoral representation is well elaborated.	50: Low to medium coverage. The details on coordination aspects are lacking, although community participation including sectoral representation is well elaborated.	80: Good to very good coverage. Coordination is mainly covered under executive team and stakeholder participation.	75: Good coverage; mainly through stakeholder participation in workshops.
	Provide a strong foundation in national institutional frameworks with clearly assigned responsibilities and authority (e.g., to coordinate policy and plans).	85: Very good coverage. Commissions and committees are recommended to take on the coordination role. The roles and responsibilities for different institutions are outlined.	80: Good to very good coverage for including various stakeholders including communities in the planning process. The specific committees/teams are tasked for coordination.	95: Excellent coverage.	85: Very good coverage. Commissions and committees are recommended to take on the coordination role. The roles and responsibilities for different institutions are outlined.	85: Very good coverage. For example, coordination across various administration levels including competent authorities is well elaborated. Transboundary coordination is outlined as well. Stakeholder participation is highlighted.	85: Very good coverage. Drought coordination team, task force and committees are recommended to take on the coordination role.	85: Very good coverage. Commissions and committees are recommended to take on the coordination role. The roles and responsibilities for different institutions are outlined.	80: Very good coverage. Participatory approach at various level is indicated alongside of coordination needs and suggestions.	65: Medium coverage. The details on coordination aspects are lacking, although stakeholder and community participation including sectoral representation is well elaborated.	50: Low to medium coverage. The details on coordination aspects are lacking, although community participation including sectoral representation is well elaborated.	80: Good to very good coverage. Coordination is mainly covered under executive team and stakeholder participation.	75: Good coverage; mainly through stakeholder participation in workshops.
	Empower local authorities to work and coordinate with civil society, communities and indigenous peoples and migrants in disaster risk management at the local level.	85: Very good coverage. Commissions and committees are recommended to take on the coordination role. A broad range of sectors and stakeholders including vulnerable groups are included in the guidelines.	80: Good to very good coverage for including various stakeholders including communities in the planning process. The specific committees/teams are tasked for coordination.	95: Excellent coverage.	85: Very good coverage. Commissions and committees are recommended to take on the coordination role. A broad range of sectors and stakeholders including vulnerable groups are included in the guidelines.	85: Very good coverage. For example, coordination across various administration levels including competent authorities is well elaborated. Transboundary coordination is outlined as well. Stakeholder participation is highlighted.	80: Good to very good coverage. Drought coordination team, task force and committees are recommended to take on the coordination role. Stakeholder participation representing various actors is recommended.	85: Very good coverage. Commissions and committees are recommended to take on the coordination role. A broad range of sectors and stakeholders including vulnerable groups are included in the guidelines.	85: Very good coverage. Participatory approach at various level is indicated alongside of coordination needs and suggestions.	75: Good coverage as part of stakeholder participation and community level engagement and assessment.	65: Medium coverage; mainly as part of community representation in various components such as vulnerability and impact assessment.	80: Good to very good coverage. Coordination is mainly covered under executive team and stakeholder participation.	75: Good coverage; mainly through stakeholder participation in workshops.
Political will and support	Encourage parliamentarians to support the implementation of disaster risk reduction by developing new or amending relevant legislation and setting budget allocations.	75: Good coverage; political will and support is addressed through representation in the drought commission/task force at national or provincial/state levels.	80: Good coverage as the major focus is on sectoral agencies and relevant stakeholders. The role of local, provincial and federal government is well covered.	95: Excellent coverage.	75: Good coverage; political will and support is addressed through representation in the drought commission/task force at national or provincial/state levels.	75: Good coverage; political will and support is addressed through representation in the drought commission/task force at national or provincial/state levels.	80: Good to very good coverage; Step 1 is dedicated to building political will and support.	75: Good coverage; political will and support is addressed through representation in the drought commission/task force at EU, national or provincial/state levels.	85: Very good coverage. Political will and support is discussed.	15: Low coverage. Political will and support is not a core component and lacks details.	10: Very low coverage. Political will and support is not a core component and lacks details.	20: Low coverage. Not a core component; briefly covered under executive team formation.	10: Very low/no coverage. Political actors are not in focus.
Periodic assessment and reporting	Periodically assess and publicly report on progress on national and local plans.	85: Very good coverage. Step 10 is dedicated to periodic review and evaluation of policies and plans. It is recommended to do ongoing and post-drought evaluations.	50: low to medium coverage. Periodic evaluation of plans is not well covered. However, the impact evaluation and evaluation of plans in relation to relevant laws and local plans is noted.	85: Very good coverage	75: Good coverage under the step on public review component.	75: Good coverage. Periodic evaluation is covered in a reasonably good manner.	80: Good to very good coverage; Step 6 on implementation also covers periodic review and evaluation.	85: Very good coverage. Step 4 covers periodic review and evaluation of policies and plans. It provides good information on implementation and update of the plans.	60: Medium coverage. Periodic evaluation and public involvement receives some attention but details are lacking.	15: Low coverage. Periodic assessment and evaluation lack details.	10: Very low coverage. Periodic assessment and evaluation lack details.	65: Medium coverage. Periodic evaluation is a core component (step 9) and is briefly mentioned.	50: Low to medium coverage. Briefly covered under implementation.
	Promote public scrutiny and encourage institutional debates, including by parliamentarians and other relevant officials, on progress reports of local and national plans.	75: Good coverage; public consultation and stakeholder engagement alongside members of national commissions and local committees is included in the guidelines. Third party evaluations by universities and research institutions and NGOs is recommended.	50: Low to medium coverage. Periodic evaluation of plans is not well covered. However, the impact evaluation and evaluation of plans in relation to relevant laws and local plans is noted.	85: Very good coverage	75: Good coverage; public consultation and stakeholder engagement alongside members of national commissions and local committees is included in the guidelines.	75: Good coverage; for example, public information and active stakeholder engagement alongside role of drought commissions is included in the guidelines.	60: Medium coverage. While public and stakeholder participation is a core component; public communication, awareness and input in the plan lacks details.	75: Good coverage; public consultation and stakeholder engagement alongside members of national commissions and local committees is included in the guidelines.	60: Medium coverage. Periodic evaluation and public involvement receives some attention but details are lacking.	15: Low coverage. Public scrutiny and institutional debates on the progress of strategies and plans lack details.	10: Very low coverage. Public scrutiny and institutional debates on the progress of strategies and plans lack details.	30: Low coverage. Mainly covered indirectly through stakeholder participation and communication.	25: Low coverage. Mainly covered indirectly through stakeholder participation and publication of plan.
Priority 3 Investing in disaster risk reduction for resilience. Public and private investment in disaster risk prevention and reduction through structural and non-structural measures are essential to enhance the economic, social, health and cultural resilience of persons, communities, countries and their assets, as well as the environment. These can be drivers of innovation, growth and job creati…
Resource allocation including finance	Allocate the necessary resources, including finance and logistics, as appropriate, at all levels of administration for the development and the implementation of disaster risk reduction strategies, policies, plans, laws and regulations in all relevant sectors.	75: Medium to high coverage. For example, resource inventory including financial resources are well covered under step 4 as well as in step 2.	10: Very low coverage. Financial assistance is briefly mentioned.	85: Very good coverage. Resource allocation including financial resources are discussed in detail underpinned by examples and references to various financial mechanisms and institutions.	60: Medium coverage. Resource allocation such as human and civic resources and financial mechanisms are discussed, though details are lacking.	10: Very low coverage. Financial aspects are not covered.	10: Very low coverage. Only budget is mentioned under implementation.	30: Low coverage. Financial aspects are briefly mentioned	70: Medium to high coverage. Financial aspects are reasonably well covered, for example innovative financial mechanisms are recommended.	65: Medium to good coverage. For example under inception resources like time, data and budget are covered.	55: Medium coverage. For example various resources such as human and financial capital are covered.	10: Very low coverage.	10: Very low coverage
	Strengthen, as appropriate, disaster-resilient public and private investments, particularly through structural, non-structural and functional disaster risk prevention and reduction measures in critical facilities.	65: Medium coverage. For example, investments from multiple sources including public and private sector is recommended.	10: Very low coverage. Financial assistance is briefly mentioned.	85: Good to very good coverage. Investments for prevention, mitigation and preparedness measures are discussed in detail underpinned by examples and references to various investment sources.	50: Low to medium coverage. Public and private sector including risk sharing and insurance related stakeholders are included in the planning process. While financial aspects receive medium coverage, sufficient information is lacking on disaster-resilient public and private investments.	10: Very low coverage. Financial aspects are not covered.	10: Ver low coverage.	10: Very low coverage.	70: Medium to high coverage. Financial aspects are reasonably well covered, for example innovative financial mechanisms are recommended alongside funding from various sources.	55: Medium coverage. Investment are briefly mentioned besides resources including budget.	20: Low coverage. Investment is briefly mentioned.	10: Very low coverage.	10: Very low coverage
Risk transfer and insurance	Promote mechanisms for disaster risk transfer and insurance, risk-sharing and retention and financial protection, as appropriate, for both public and private investment in order to reduce the financial impact of disasters on Governments and societies, in urban and rural areas.	25: Low coverage. Insurance is briefly mentioned.	10: Very low coverage.	85: Good to very good coverage. Risk transfer, insurance and safety nets are discussed in detail with examples.	60: Medium coverage. Risk sharing institutions such as insurance companies are including in the planning process and options such as agricultural insurance are recommended.	10: Very low coverage. For example, insurance is not covered.	15: Low coverage. Crop insurance is briefly mentioned.	10: Very low coverage.	60: Medium coverage. Insurance and safety nets are discussed.	40: low to medium coverage. Insurance and safety nets are briefly mentioned.	75: Good to very good coverage. Risk transfer including insurance is well covered.	10: Very low coverage.	10: Very low coverage
Mainstreaming DRR assessments into land use policy	Promote the mainstreaming of disaster risk assessments into land-use policy development and implementation, including urban planning, land degradation assessments and informal and non-permanent housing, and the use of guidelines and follow-up tools informed by anticipated demographic and environmental changes.	25: Low coverage. Land use is briefly mentioned.	50: Low to medium coverage. Land aspects and land use including land use change receives low to medium coverage.	85: Good to very good coverage. Land use is discussed in detail, for example under the section of reducing underlying factors of drought risk.	15: Low coverage. Land use is briefly mentioned.	15: Low coverage. Land use planning is briefly mentioned.	15: Low coverage. Rangelands are briefly mentioned.	25: Low coverage. Land use is briefly mentioned.	15: Low coverage. Land use is briefly mentioned.	40: low to medium coverage. Land use is discussed but details are lacking on land use policy and planning.	60: Medium coverage. Land use, land degradation including desertification are discussed.	40: Low to medium coverage. Land related aspects are briefly discussed.	10: Very low coverage
Mainstreaming DRR into rural development plans	Promote the mainstreaming of disaster risk assessment, mapping and management into rural development planning and management of, inter alia, mountains, rivers, coastal flood plain areas, drylands, wetlands and all other areas prone to droughts and flooding, including through the identification of areas that are safe for human settlement, and at the same time preserving ecosystem functions that he…	25: Low coverage. Rural development measures are briefly mentioned.	25: Low coverage. Rural planning is not in focus, however, water supply planning guide could be applied for both rural and urban settings.	70: Medium to good coverage. Rural development is discussed in a reasonably good way under various sections.	10: Very low coverage.	80: Good to very good coverage. Rural development is covered very well including policies and programmes for rural development.	25: Low coverage. Rural economy and rural farmers are briefly mentioned.	20: Low coverage. Rural development including EU common agriculture policy is briefly mentioned.	15: Low coverage. Rural aspects are briefly mentioned.	20: Low coverage. Rural aspects are briefly mentioned.	20: Low coverage. Rural aspects are briefly mentioned.	10: Very low coverage.	10: Very low coverage
Business resilience and protection of livelihoods and productive assets	Increase business resilience and protection of livelihoods and productive assets throughout the supply chains, ensure continuity of services and integrate disaster risk management into business models and practices.	25: Low coverage. Business, livelihoods and assets are briefly mentioned.	20: Low coverage. Business aspects are briefly covered under. industry	65: Medium coverage. Livelihoods are discussed in detail while business aspects lacked details.	10: Very low coverage.	15: Low coverage. Business resilience, livelihoods and productive assets lack details.	10: Very low coverage.	10: Very low coverage.	30: Low coverage. Business aspects are briefly mentioned, though resilience in general remain the main focus of the guidelines.	40: Low to medium coverage. Business and livelihoods are briefly discussed.	40: Low to medium coverage. Business and livelihoods are briefly discussed.	10: Very low coverage.	10: Very low coverage
	Strengthen the protection of livelihoods and productive assets, including livestock, working animals, tools and seeds.	50: Low to medium coverage. Livestock receives medium coverage.	10: Very low coverage.	85: Very good coverage. For example livestock based livelihoods are discussed in detail; livestock health and marketing also receives very good attention.	15: Low coverage. Livestock is briefly mentioned.	10: Low coverage.	20: Low coverage. Livestock is briefly mentioned.	10: Very low coverage.	60: Medium coverage. Protection of livelihoods including livestock is reasonably well covered.	60: Medium coverage. For example, livestock is discussed in some details.	20: Low coverage. Livelihoods including livestock are briefly mentioned.	60: Medium coverage. Livestock is reasonably well covered along side other income sources.	10: Very low coverage
Sustainable use and management of ecosystems	Strengthen the sustainable use and management of ecosystems and implement integrated environmental and natural resource management approaches that incorporate disaster risk reduction.	50: Low to medium coverage. Integrated approaches are recommended alongside sustainable development including link to sustainable development goals.	50: low to medium coverage. The water and ecosystem sustainability aspects receives low to medium coverage.	85: Very good coverage on various aspects of sustainability such as sustainable land use, agricultural practices, ecosystems. Integrated approaches are also well presented. Link to Millennium development goals are made.	40: Low to medium coverage. Integrated approaches are recommended. However, information is lacking on sustainability aspects.	85: Very good to excellent coverage. For example, sustainable water resources use and protection of environment and ecosystems are covered very well.	40: Low to medium coverage. Environment is an important element and sustainable development including link to desertification is briefly mentioned.	75: Good coverage. Environmental and ecological aspects are very well covered. Sustainable water use and integrated approach are also recommended.	85: Very good coverage. Sustainable developing including link to SDGs is very well covered alongside giving high focus on integrated approach and environmental aspects.	60: Medium coverage. Environmental aspects are well covered. However, limited coverage on sustainable and integrated approaches.	70: Good coverage. Sustainability and environmental aspects are well covered. Integrated approaches are also recommended.	30: Low coverage. Integration, environment and sustainability are briefly mentioned.	55: Medium coverage. Integrated approach and environmental aspects are discussed.
Health and safety	Enhance the resilience of national health systems, including by integrating disaster risk management into primary, secondary and tertiary health care, especially at the local level.	25: Low coverage. Health is briefly mentioned under impacts and as a sector to be including in drought planning.	50: Low to medium coverage. Health aspects including relevant institutions receive low to medium coverage.	75: Good to very good coverage. Public health issues are discussed in detail.	15: Low coverage. Public health is briefly mentioned.	30: Low coverage. Health is briefly mentioned, but sufficient details are lacking.	15: Low coverage. Health is briefly mentioned.	15: Low coverage. Health is briefly mentioned	60: Medium coverage. Health aspects including public health and resilience of infrastructure is mentioned.	15: Low coverage. Health aspects are briefly mentioned.	15: Low coverage. Health aspects are briefly mentioned.	10: Very low coverage.	20: Low coverage. Health aspects are briefly mentioned.
	Encourage the adoption of policies and programmes addressing disaster induced human mobility to strengthen the resilience of affected people and that of host communities, in accordance with national laws and circumstances.	10: Very low coverage.	10: Very low coverage.	50: Medium coverage. Migration and mobility aspects are covered though details are lacking.	10: Very low coverage.	10: Very low coverage.	10: Very low coverage.	10: Very low coverage.	40: Low to medium coverage. Migration is briefly discussed.	10: Very low coverage	15: Low coverage. Migration is briefly mentioned.	10: Very low coverage.	10: Very low coverage
	Strengthen the design and implementation of inclusive policies and social safety-net mechanisms.	50: Low to medium coverage. While inclusive policy development is a core component of the guidelines, focus on social safety-net mechanisms is very limited.	30: Low coverage; mainly under inclusive policy development aspects.	80: Good to very good coverage. Risk transfer and safety nets including insurance are well covered. Inclusive policy making is a core component that is very well covered.	30: Low coverage. While inclusive policy development is a core component of the guidelines, focus on social safety-net mechanisms is very limited besides limited info on insurance aspects.	20: Low coverage. While inclusive policy development is a core component of the guidelines, focus on social safety-net mechanisms is limited.	15: Low coverage. While inclusive policy development is a core component of the guidelines, social safety-net mechanisms are not mentioned.	15: Low coverage. While inclusive policy development is a core component of the guidelines, social safety-net mechanisms are not mentioned.	60: Medium coverage. Social safety nets alongside of insurance mechanisms are discussed. In general, inclusive approach to policy making is recommended.	20: Low coverage. Insurance and safety nets are briefly mentioned. However, multiple sectors and stakeholder participation is a core element of the approach.	75: Good to very good coverage. Safety-net mechanisms are discussed alongside of risk transfer including insurance.	10: Very low coverage.	10: Very low coverage
Priority 4 Enhancing disaster preparedness for effective response, and to «Build Back Better» in recovery, rehabilitation and reconstruction. Experience indicates that disaster preparedness needs to be strengthened for more effective response and ensure capacities are in place for effective recovery. Disasters have also demonstrated that the recovery, rehabilitation and reconstruction phase, whic…
Disaster preparedness and contingency policies, plans and programmes	Prepare or review and periodically update disaster preparedness and contingency policies, plans and programmes with the involvement of the relevant institutions, considering climate change scenarios and their impact on disaster risk, and facilitating, as appropriate, the participation of all sectors and relevant stakeholders.	75: Good coverage. Drought preparedness policy and planning are very well covered. However, contingency aspects lack focus.	85: Very good coverage. The guidelines provide very useful information for preparedness planning for the case study region. Moreover, references are made to a emergency and contingency planning documents. Therefore, overall, the guidelines provide very good coverage of preparedness, emergency and contingency planning for drought risk management for water supply sector.	85: Very good coverage. Drought preparedness is covered very well. Contingency planning is well covered.	85: Good to very good coverage. Drought preparedness policy and planning are very well covered. Contingency planning is also discussed. Emergency measures are well covered.	85: Good to very good coverage. Drought preparedness policy and planning are very well covered. Contingency planning is also discussed. Emergency measures are well covered.	75: Good coverage. Drought preparedness policy and planning are very well covered. However, contingency aspects lack focus.	75: Good to very good coverage. Drought preparedness policy and planning and emergency measures are very well covered. However, contingency planning lacks focus.	75: Good coverage. Drought preparedness policy and planning are very well covered. However, contingency aspects lack focus.	60: Medium coverage. Drought preparedness is reasonably well covered. However, contingency aspects lack focus.	25: Low coverage. Disaster preparedness and contingency aspects lack focus.	75: Good coverage. Drought preparedness and contingency planning are well covered.	60: Medium coverage. Drought preparedness is reasonably well covered. However, contingency aspects lack focus.
People-centred multi-hazard, multisectoral forecasting and early warning systems	Invest in, develop, maintain and strengthen people-centred multi-hazard, multisectoral forecasting and early warning systems, disaster risk and emergency communications mechanisms, social technologies and hazard monitoring telecommunications systems; develop such systems through a participatory process; tailor them to the needs of users, including social and cultural requirements, in particular g…	50: Low to medium coverage. Multi-hazard approach lack focus. However, multiple sectors and stakeholder participation are well covered.	50: Low to medium coverage. Stakeholder involvement including various public, private and citizen organizations is well covered. However, multi-hazard and multi-sectoral approaches lack focus.	50: Low to medium coverage. Multi-hazard approach lack focus. However, multiple sectors and stakeholder participation are well covered.	50: Low to medium coverage. Multi-hazard approach lack focus. However, multiple sectors and stakeholder participation are well covered.	50: Low to medium coverage. Multi-hazard approach lack focus. However, multiple sectors and stakeholder participation are well covered.	50: Low to medium coverage. Multi-hazard approach lack focus. However, multiple sectors and stakeholder participation are well covered.	70: Medium to good coverage. Multi-sectoral approach including stakeholder participation is well covered. Multi-hazard approach is recommended and briefly covered.	50: Low to medium coverage. Multi-hazard approach lack focus. However, multiple sectors and stakeholder participation are well covered.	70: Medium to good coverage. Multi-sectoral approach including stakeholder participation is well covered. Multi-hazard approach briefly mentioned. Drought monitoring and early warning systems are well covered in general.	50: Low to medium coverage. Multi-hazard approach lack focus. However, drought monitoring and early warning is very well covered.	25: Low coverage. The main focus is on drought planning for agriculture sector. However, stakeholder participation is well covered.	40: Low to medium coverage. The main focus is on urban drought planning, and hydrological system planning. The stakeholder participation is reasonably well covered.
Disaster response including in emergencies	Train the existing workforce and voluntary workers in disaster response and strengthen technical and logistical capacities to ensure better response in emergencies.	80: In general, disaster response including emergency measures receives good to very good coverage. Training and capacity development aspects are also covered well, though more generally.	85: Very good coverage. In general, disaster response including emergency measures receives good to very good coverage. There is a separate guideline for emergency and contingency planning, which also includes training aspects.	75: Good coverage. In general, response planning including emergencies is well covered. Training and capacity development aspects also.	75: Good coverage. In general, response planning including emergencies is well covered. Training and capacity development aspects also.	60: Medium coverage. In general, response planning including emergencies is well covered. Training and capacity development lack details.	30: Low coverage. Drought response including emergency situation lacks focus. Capacity development is briefly mentioned.	60: Medium coverage. Training and emergency aspects are well covered. Response planning lack focus.	75: Good coverage. In general, response planning including emergencies is well covered. Training and capacity development aspects also.	50: Low to medium coverage. Short-term response to drought including emergency situation are discussed in some details. However, training and capacity development lack details.	40: Low to medium coverage. Drought response is discussed in some details. However, training and capacity development lack details.	40: Low to medium coverage. Drought contingency plan is discussed in some details. However, training and capacity development lack details.	40: Low to medium coverage. Drought response aspects are briefly covered. However, emergency and training aspects lack focus.
	Establish community centres for the promotion of public awareness and the stockpiling of necessary materials to implement rescue and relief activities.	50: Low to medium coverage. Relief efforts are discussed, though lack details.	40: Low to medium coverage. Relief and rescue aspects lack focus, while community and emergency aspects are well covered in general.	75: Good coverage. In general, relief activities are well covered; community participation is also.	40: Low to medium coverage. Relief and rescue aspects lack focus, while community and emergency aspects are well covered in general.	30: Low coverage. Relief and rescue aspects and community aspects lack focus, while emergency aspects are well covered in general.	30: Low coverage. Drought response including emergency situation lacks focus. Relief activities are briefly mentioned.	40: Low to medium coverage. Relief and rescue aspects lack focus, while community and emergency aspects are well covered in general.	75: Good coverage. In general, relief activities are well covered; community participation also.	40: Low to medium coverage. Relief and rescue aspects lack focus, while community and short-term response including emergency aspects are reasonably well covered in general.	40: Low coverage to medium coverage. Relief and community aspects are briefly covered.	30: Low coverage. Relief and rescue aspects and community aspects lack focus, while contingency planning is reasonably well covered.	15: Low coverage. Relief and rescue aspects and community aspects lack focus, while response planning is briefly covered.
	Strengthen the capacity of local authorities to evacuate persons living in disaster-prone areas.	50: Low to medium coverage. Capacity development is well covered in general, though details are lacking on evacuation/migration.	40: Low to medium coverage. Evacuation aspects, while capacity development and training is mentioned.	60: Medium coverage. Capacity development is well covered in general, though details are lacking on evacuation/migration.	40: Low to medium coverage. Evacuation aspects lack focus, while capacity development and training is mentioned.	30: Low coverage. Relief and rescue aspects and community aspects lack focus, while emergency aspects are well covered in general.	10: Very low coverage. Capacity development is briefly mentioned. Evacuation is not covered.	40: Low to medium coverage. Evacuation aspects lack focus, while capacity development and training is mentioned.	60: Medium coverage. Capacity development is well covered in general, though details are lacking on evacuation/migration.	10: Very low coverage. Capacity development is briefly mentioned. Evacuation aspects are not covered.	15: Low coverage. Capacity development is briefly discussed. Evacuation aspects are not covered.	10: Very low coverage. Training is briefly mentioned. Evacuation aspects are not covered.	10: Very low coverage. Training is briefly mentioned. Evacuation aspects are not covered.
Post-disaster recovery, rehabilitation and reconstruction	Adopt public policies and actions that support the role of public service workers to establish or strengthen coordination and funding mechanisms and procedures for relief assistance and plan and prepare for post-disaster recovery and reconstruction.	50: Low to medium coverage. Aspects related to relief, response and reconstruction are mentioned, though lack specific details on procedures.	15: Low coverage. Post-disaster recovery and reconstruction lack focus.	85: Very good coverage. For example, post-disaster activities including recovery, rehabilitation and reconstruction are covered. Recovery is discussed in a very good manner.	15: Low coverage. Post-disaster recovery and reconstruction lack focus.	60: Medium coverage. Post-drought evaluation and recovery is reasonably well covered. However, reconstruction aspects lack focus.	15: Low coverage. Post-disaster recovery and reconstruction lack focus.	15: Low coverage. Post-disaster recovery and reconstruction lack focus.	50: Low to medium coverage. Post-drought recovery is reasonably well covered. However, reconstruction aspects lack focus.	15: Low coverage. Post-disaster recovery and reconstruction lack focus.	15: Low coverage. Post-disaster recovery and reconstruction lack focus.	15: Low coverage. Post-disaster recovery and reconstruction lack focus.	15: Low coverage. Post-disaster recovery and reconstruction lack focus.
	Ensure the continuity of operations and planning, including social and economic recovery, and the provision of basic services in the post-disaster phase.	50: Low to medium coverage. Recovery aspects are discussed, though details are lacking.	15: Low coverage. Post-disaster recovery and reconstruction lack focus.	85: Very good coverage. For example, post-disaster activities including recovery, rehabilitation and reconstruction are covered. Recovery is discussed in a very good manner.	15: Low coverage. Post-disaster recovery and reconstruction lack focus.	60: Medium coverage. Post-drought evaluation and recovery is reasonably well covered. However, reconstruction aspects lack focus.	15: Low coverage. Post-disaster recovery and reconstruction lack focus.	15: Low coverage. Post-disaster recovery and reconstruction lack focus.	50: Low to medium coverage. Post-drought recovery is reasonably well covered. However, reconstruction aspects lack focus.	15: Low coverage. Post-disaster recovery and reconstruction lack focus.	15: Low coverage. Post-disaster recovery and reconstruction lack focus.	15: Low coverage. Post-disaster recovery and reconstruction lack focus.	15: Low coverage. Post-disaster recovery and reconstruction lack focus.
	Develop guidance for preparedness for disaster reconstruction, such as on land-use planning and structural standards improvement, including by learning from the recovery and reconstruction programmes over the decade since the adoption of the Hyogo Framework for Action, and exchanging experiences, knowledge and lessons learned.	20: Low coverage. Reconstruction including land use planning are briefly covered.	15: Low coverage. Post-disaster recovery and reconstruction lack focus.	75: Good coverage. Post-disaster activities are covered very well in general. Land use planning and reconstruction receives good coverage.	15: Low coverage. Post-disaster recovery and reconstruction lack focus.	15: Low coverage. Reconstruction including land use planning lack details.	15: Low coverage. Post-disaster recovery and reconstruction lack focus.	15: Low coverage. Post-disaster recovery and reconstruction lack focus.	15: Low coverage. Reconstruction including land use planning lack details.	30: Low coverage. Post-disaster recovery and reconstruction lack focus. However, land use planning is mentioned in general.	30: Low coverage. Post-disaster recovery and reconstruction lack focus. However, land use planning is mentioned in general.	15: Low coverage. Reconstruction including land use planning lack details.	15: Low coverage. Reconstruction including land use planning lack details.
	Enhance recovery schemes to provide psychosocial support and mental health services for all people in need.	15: Low coverage. Health is briefly mentioned.	15: Low coverage. Health is briefly mentioned.	75: Good coverage. Health aspects are covered well in general.	15: Low coverage. Health is briefly mentioned.	15: Low coverage. Health is briefly mentioned.	15: Low coverage. Health is briefly mentioned.	15: Low coverage. Health is briefly mentioned.	50: Low to medium coverage. Health and recovery aspects are mentioned in some detail.	15: Low coverage. Health is briefly mentioned.	15: Low coverage. Health is briefly mentioned.	10: Very low coverage. Health aspects lack focus.	20: Low coverage. Health aspects are briefly mentioned.
Resilience of new and existing critical infrastructure	Promote the resilience of new and existing critical infrastructure, including water, transportation and telecommunications infrastructure, educational facilities, hospitals and other health facilities, to ensure that they remain safe, effective and operational during and after disasters in order to provide live-saving and essential services.	30: Low coverage. Infrastructure is briefly mentioned.	30: Low coverage. Infrastructure is briefly mentioned.	75: Good coverage. Critical infrastructure is discussed in relation to both floods and droughts.	75: Good coverage. Infrastructure aspects are well covered. For examples, water supply related infrastructure is discussed.	85: Good to very good coverage. Infrastructure aspects are very well covered.	15: Low coverage. Infrastructure is briefly mentioned.	10: Very low coverage. Infrastructure aspects lack focus.	25: Low coverage. Infrastructure aspects are briefly mentioned.	60: Medium coverage. Infrastructure aspects are reasonably well covered. For examples, water storage related infrastructure is discussed.	60: Medium coverage. Infrastructure aspects are reasonably well covered. For examples, water supply related infrastructure is discussed.	25: Low coverage. Infrastructure aspects are briefly mentioned.	25: Low coverage. Infrastructure aspects are briefly mentioned.
	Consider the relocation of public facilities and infrastructures to areas outside the risk range, wherever possible, in the post-disaster reconstruction process, in consultation with the people concerned, as appropriate.	10: Very low coverage. Although infrastructure is briefly mentioned, relocation is not considered.	10: Very low coverage. Although infrastructure is briefly mentioned, relocation is not considered.	30: Low coverage. While infrastructure is well covered, relocation aspects lack focus.	10: Very low coverage. Although infrastructure is briefly mentioned, relocation is not considered.	40: Low coverage. While infrastructure is very well covered, relocation aspects lack focus.	10: Very low coverage. Although infrastructure is briefly mentioned, relocation is not considered.	10: Very low coverage. Infrastructure aspects lack focus.	25: Low coverage. Infrastructure aspects are briefly mentioned. Relocation aspects lack focus.	25: Low coverage. Infrastructure aspects are reasonably well covered. Relocation aspects lack focus.	25: Low coverage. Infrastructure aspects are reasonably well covered. Relocation aspects lack focus.	15: Low coverage. Infrastructure is mentioned. Relocation aspects lack focus.	15: Low coverage. Infrastructure is mentioned. Relocation aspects lack focus.
